# Supplementary figures and images for: MnO2 decorated graphene nanoribbons with superior permittivity and excellent microwave shielding properties
Source: Royal Society of Chemistry journal article supplement (doi:10.1039/c3ta14854h), 2013-12-20

Figure S1: HRTTEM images of MnO<sub>2</sub> decorated graphene nanoribbons

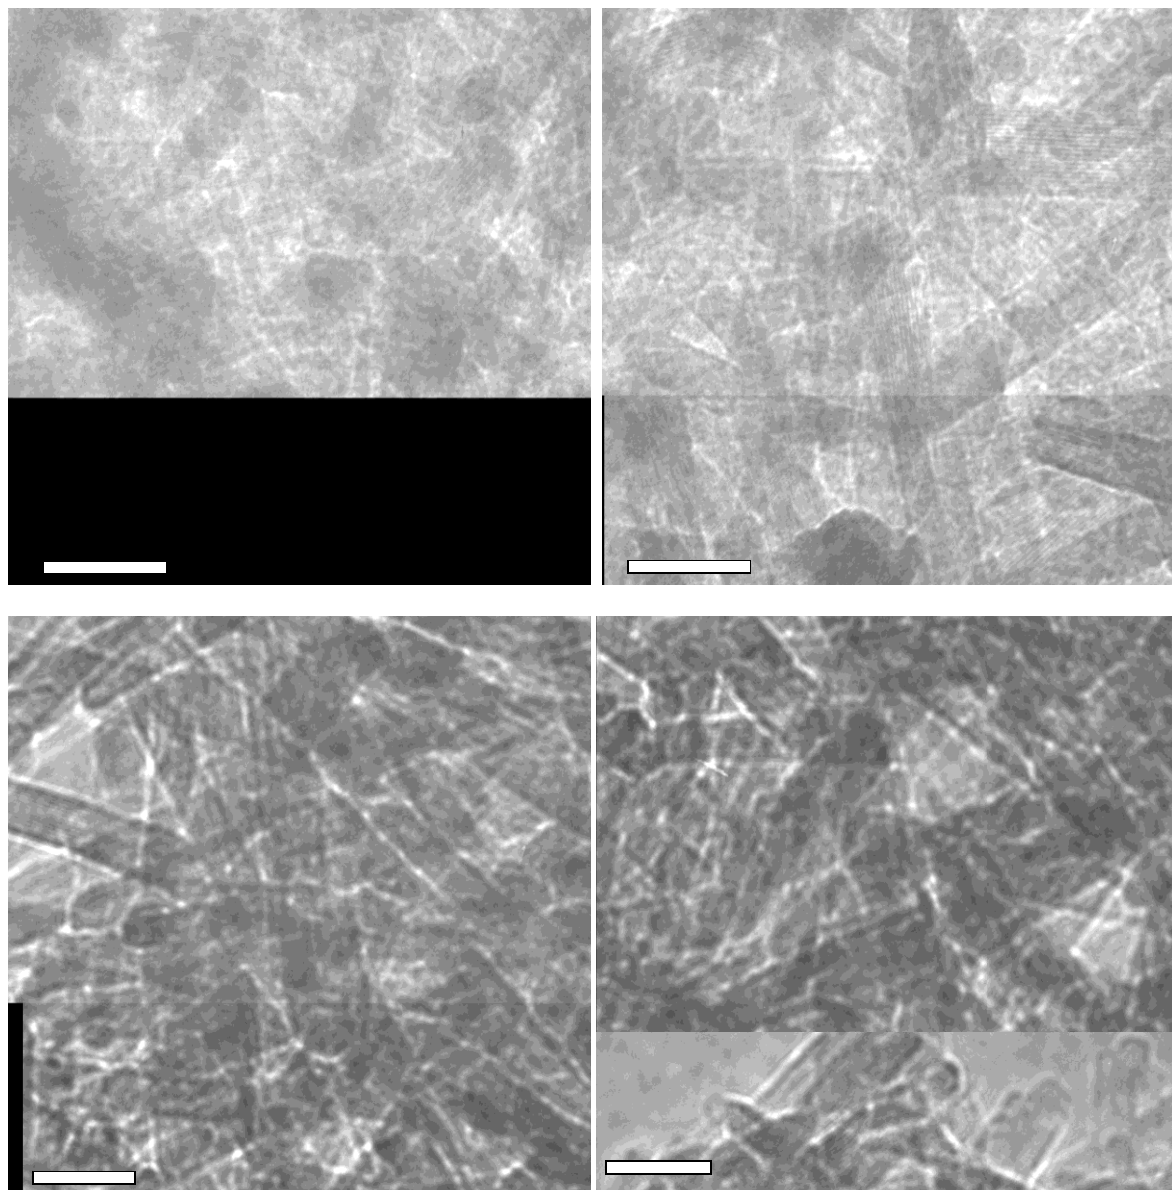

Supplement: c3ta14854h.pdf [file c3ta14854h.pdf]
